# Supplementary material
Source: publisher figshare collection journal article supplement (https://frontiersin.figshare.com/ndownloader/files/12542360)
Supplement: Supplementary file [file 12542360]

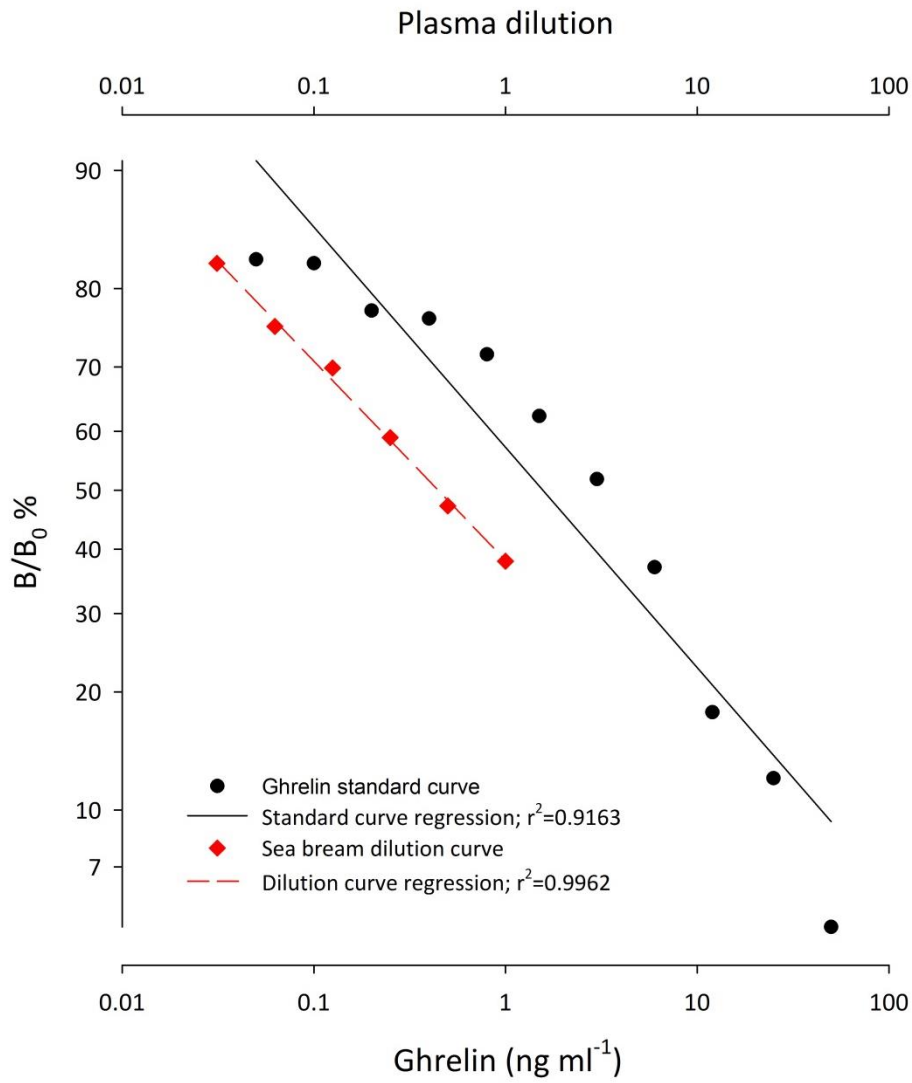

**Supplementary figure 1.** Binding inhibition curves on a log-logit scale showing parallel specific binding for synthetic rainbow trout Ghrelin standard (filled circles) and serial dilutions of sea bream plasma (squares) to the anti-rat Ghrelin [1-11] antisera.
